# Supplementary material for: 25-gauge vitrectomy with gas tamponade for uncomplicated rhegmatogenous retinal detachment: experienced vs. inexperienced surgeons
Source: PeerJ. 2025 Aug 11;13:e19795. doi: 10.7717/peerj.19795 (PMC12352418; doi:10.7717/peerj.19795)
Supplement: Supplemental Information 1 — Demographic data, surgery details, results and complications. These data were used for statistical analysis to compare the results of pars plana vitrectomy for uncomplicated retinal detachment between experienced and inexperienced surgeons. [file peerj-13-19795-s001.xlsx]

## Sheet: ESG
Patient number	Age	Eye	BCVA	Lens status	Date of diagnosis	Duration of symptoms (days)	Date of surgery	Time to surgery (days)	Anesthesia	RD extent (hours)	Number of RB	RB localization	RB between 4-8	Macula on/off	Perfluorodecalin?	Laser? Cryo?	Tamponade	Sutures ?	Reattachement?	Postoper. IOP	Postoper. Complications	Last BCVA	Last check-up	Months of follow-up	Cataract surgery?	Number of surgeries	Note	Reason for redatchement	Sex
1	68	OL	0.01	Phakic	2015-10-01	2	2015-10-02	1	LA	9	1	11	no	off	no	Cryo of RB	SF6	no	yes	norm.	0	0.8	2018-09-17	36.0333	yes	1			F
2	62	OP	0.001	Phakic			2015-10-29		LA	6	1	11	no	off	no	Cryo of RB	SF6	no	yes	norm.	0	0.5	2016-10-22	11.9667	yes	1			F
3	58	OP	0.01	Phakic	2015-10-31	1	2015-11-02	2	LA	6	4	12,9,7,2	yes	on	no	Cryo 360°	C3F8	no	yes	hypertony	Hypertony – topical medication+oral acetazolamide	1	2018-10-29	36.4	yes	1			M
4	77	OL	1	Phakic			2015-11-21		LA	6	2	2.6	yes	off	no	Cryo of RB	C3F8	no	yes	norm.	0	1	2018-01-15	26.2	yes	1			M
5	68	OP	0.05	Phakic		8	2015-11-23		LA	6	3	10,11,3	no	off	no	Cryo of RB	C3F8	no	yes	norm.	0	0.666667	2016-04-04	4.43333	no	1			M
6	60	OP	0.05	Phakic		10	2015-11-26		LA	4	2	11.1	no	off	no	Cryo of RB	SF6	no	yes	norm.	0	0.666667	2018-09-01	33.6667	yes	1			F
7	73	OL	0.03	Pseudophakic	2015-11-26	60	2015-12-03	7	LA	11	1	1	no	off	yes	Cryo of RB	SF6	no	yes	norm.	0	0.1	2017-07-24	19.9667	no	1			M
8	69	OP	0.01	Phakic			2015-12-07		LA	8	3	7,8,11	yes	off	no	Cryo of RB	C3F8	no	yes	norm.	0	0.8	2016-07-13	7.3	yes	1			F
9	78	OL	0.001	Pseudophakic		20	2015-12-15		LA	12	1	11	no	off	yes	Cryo 360°	C3F8	no	yes	norm.	0	0.5	2016-09-17	9.23333	no	1			M
10	69	OP	0.001	Pseudophakic		3	2016-01-02		LA	5	1	11	no	off	yes	Cryo of RB	SF6	no	yes	norm.	0	0.9	2018-10-24	34.2	no	1			M
11	51	OP	1	Phakic	2016-01-06	10	2016-01-07	1	LA	4	2	11.6	yes	on	no	Cryo of RB	SF6	no	yes	norm.	0	1	2017-02-25	13.8333	yes	1			M
12	62	OL	0.66	Phakic	2016-02-04	10	2016-02-18	14	LA	3	1	11	no	on	no	Cryo of RB	SF6	no	yes	norm.	0	1	2016-05-15	2.9	yes	1			F
13	70	OP	1	Phakic	2016-02-24	14	2016-02-25	1	LA	4	1	?	no	off	no	Cryo of RB	SF6	no	yes	hypertony	Hypertony - topical medication	0.8	2017-11-01	20.5	yes	1			M
14	53	OL	0.1	Pseudophakic			2016-03-10		LA	7	3	3,10,11	no	off	no	Cryo of RB	SF6	no	yes	hypertony	Hypertony - topical medication	1	2018-02-15	23.5667	no	1			M
15	47	OP	0.001	Phakic		5	2016-04-11		LA	10	10	between 6 - 12	yes	off	no	Cryo of RB	C3F8	no	yes	norm.	0	0.666667	2018-09-21	29.7667	yes	1			F
16	50	OL	0.5	Phakic	2016-04-11	4	2016-04-12	1	LA	6	1	9	no	on	no	Cryo of RB	SF6	no	yes	norm.		0.8	2017-02-08	10.0667	yes	1			M
17	79	OP	0.05	Pseudophakic	2016-04-15	14	2016-04-17	2	LA	8	1	retinotomy u 3	no	off	yes	Cryo of RB	C3F8	no	yes	hypertony	Hypertony – topical medication	0.8	2016-07-15	2.96667	no	1			F
18	67	OP	0.33	Phakic	2016-04-15	3	2016-04-17	2	LA	3	1	11	no	on	no	Cryo of RB	SF6	no	yes	hypertony	Hypertony – topical medication	0.8	2016-12-20	8.23333	yes	1			M
19	43	OL	1	Phakic	2016-04-16	20	2016-04-18	2	CA	4	10	2,12-7	yes	on	yes	Cryo+Laser of RB	C3F8	no	yes	norm.	0	1	2018-02-07	22	yes	1			M
20	61	OP	1	Pseudophakic	2016-04-25	30	2016-04-26	1	LA	4	1	7	yes	on	no	Cryo of RB	C3F8	no	yes	hypertony	Hypertony – topical medication	1	2016-07-25	3	no	1			M
21	71	OL	0.66	Phakic	2016-05-06	1	2016-05-06	0	LA	6	1	2	no	off	no	Cryo of RB	C3F8	no	yes	norm.	0	1	2016-08-04	3	yes	1			F
22	51	OL	1	Phakic		28	2016-05-24		LA	3	1	12	no	on	no	Cryo of RB	SF6	no	yes	norm.	ERM	1	2017-11-03	17.6	yes	1			F
23	57	OP	1	Phakic	2016-05-26	7	2016-05-26	0	LA	4	10	11.7	yes	on	no	Cryo+Laser of RB	C3F8	no	yes	hypertony	Hypertony - topical medication	1	2017-11-02	17.5	yes	1			M
24	54	OP	0.001	Phakic		7	2016-06-02		LA	10	2	2.11	no	off	no	Cryo of RB	C3F8	no	yes	hypertony	Hypertony - topical medication	0.33	2016-09-07	3.23333	yes	1	RD with macular hole		M
25	59	OL	0.16	Phakic		2	2016-06-02		LA	6	10	between 12- 6	yes	off	no	Cryo of RB	C3F8	no	no	hypertony	Hypertony - topical medication	0.1	2016-10-10	4.33333	yes	2	rePPV+SO 12/2016	PVR	M
26	45	OL	0.66	Phakic		7	2016-06-03		LA	3	2	2.11	no	on	no	Cryo of RB	SF6	no	yes	norm.	0	1	2018-03-23	21.9333	no	1			M
27	69	OP	0.1	Phakic		2	2016-06-06		LA	5	1	11	no	off	no	Cryo of RB	SF6	no	yes	norm.	0	0.5	2016-10-03	3.96667	no	1			M
28	66	OP	0.25	Pseudophakic	2016-06-09		2016-06-13	4	LA	3	3	9.1	no	on	no	Cryo of RB	SF6	no	yes	norm.	0	0.666667	2018-02-21	20.6	no	1			M
29	62	OP	0.001	Phakic		4	2016-06-30		LA	6	2	11.5	yes	off	no	Cryo of RB	SF6	no	yes	norm.	ERM	1	2017-11-10	16.6	yes	1			M
30	63	OL	0.66	Pseudophakic	2016-06-28	1	2016-06-30	2	LA	9	2	12, retinotomy	no	off	no	Cryo+Laser of RB	C3F8	no	yes	norm.	0	1	2016-10-03	3.16667	no	1			F
31	42	OP	1	Phakic	2016-07-05	4	2016-07-07	2	CA	5	10	10, 11, 7, 4	yes	off	no	Cryo of RB+Laser 360°	SF6	no	yes	norm.	0	1	2018-08-28	26.0667	yes	1			F
32	52	OL	0.66	Phakic			2016-08-02		LA	6	2	11, 9	no	on	no	Cryo of RB	SF6	no	yes	hypertony	Hypertony - topical medication	0.5	2016-11-18	3.6	no	1			F
33	36	OP	0.05	Pseudophakic	2016-07-26	2	2016-08-04	9	CA	12	10	1, 6, temp.	yes	off	no	Cryo of RB+Laser 360°	C3F8	no	yes	hypertony	Hypertony - topical medication	0.1	2017-09-26	13.9333	no	1			M
34	69	OP	0.2	Phakic	2016-08-08	2	2016-08-09	1	LA	3	10	between 5-7	yes	off	no	Cryo of RB+Laser 360°	C3F8	no	yes	norm.	0	1	2018-04-06	20.1667	yes	1			M
35	47	OP	0.016	Phakic			2016-08-25		CA	10	3	1, 2, 3	no	off	no	Cryo 360°	C3F8	no	yes	norm.	0	1	2017-12-13	15.8333	yes	1			F
36	62	OL	0.66	Phakic			2016-10-06		LA	9	2	11, 2	no	off	no	Cryo of RB	SF6	no	yes	norm.	0	0.666667	2017-04-29	6.83333	yes	1			M
37	65	OL	0.66	Phakic		14	2016-10-11		LA	7	4	11-12, 11, 7	yes	off	no	Cryo of RB	C3F8	no	yes	hypertony	Hypertony - topical medication	0.5	2017-03-08	4.93333	yes	1			M
38	48	OP	1	Phakic	2016-10-26	1	2016-10-27	1	LA	6	1	12	no	off	no	Cryo of RB	SF6	no	yes	hypertony	Hypertony - topical medication	1	2017-08-03	9.33333	yes	1			M
40	64	OL	0.001	Pseudophakic		7	2016-11-14		LA	12	1	1	no	off	no	Cryo of RB	C3F8	no	yes	hypertony	Hypertony - topical medication+oral acetazolamide, macular hole	0.1	2017-02-20	3.26667	no	1	High myopia, RD with macular hole, perzistent macular hole after PPV for RD		M
39	71	OP	0.1	Phakic	2016-11-10	4	2016-11-14	4	LA	8	2	11, 6	yes	off	no	Cryo in the extent of RD	C3F8	no	yes	hypertony	Hypertony - topical medication, macular hole	0.2	2018-12-11	25.2333	yes	1	rePPV for macular hole		M
41	59	OP	0.1	Phakic	2016-11-15	5	2016-11-21	6	LA	8	1	11	no	off	no	Laser of RB	SF6	no	yes	norm.		1	2018-03-28	16.4	yes	1			F
42	65	OL	0.16	Phakic			2016-11-24		LA	5	10	10, 11, 1, 6-7	yes	on	no	Cryo of RB	SF6	no	yes	hypotony	hypotony	0.66	2017-07-04	7.4	yes	1			M
43	41	OL	0.1	Phakic		2	2016-12-15		LA	7	3	10, 12, 5	yes	off	no	Cryo in the extent of RD	C3F8	no	yes	hypertony	Hypertony - topical medication	0.5	2018-06-27	18.6333	yes	1			M
44	46	OP	0.66	Pseudophakic			2016-12-29		CA	4	1	7	yes	on	no	Cryo of RB	C3F8	no	yes	norm.	Hypertony - topical medication	1	2018-09-26	21.2	no	1			F
45	19	OP	0.66	Phakic			2016-12-29		CA	4	4	9-10, 7, 6, 5	yes	off	yes	Cryo of RB+Laser 360°	C3F8	no	yes	hypertony	Hypertony - topical medication, subret. perfluorodecalin	0.66	2017-12-13	11.6333	yes	1			M
46	54	OP	0.001	Pseudophakic	2017-01-02		2017-01-03	1	LA	10	1	11	no	off	no	Cryo of RB	C3F8	no	yes	hypertony	Hypertony - topical medication	0.33	2017-09-04	8.13333	no	1	High myopia		F
48	59	OL	0.001	Phakic	2017-01-19	3	2017-01-23	4	LA	7	2	11-1	no	off	no	Cryo+Laser of RB	C3F8	no	yes	hypertony	Hypertony - topical medication+oral acetazolamide, ERM	0.333333	2018-12-17	23.1	yes	1	rePPV for ERM 10/2018		M
47	75	OL	1	Pseudophakic	2017-01-22	4	2017-01-23	1	LA	4	2	1	no	on	no	Cryo of RB	SF6	no	yes	norm.	0	0.8	2017-04-26	3.1	no	1			M
49	67	OL	0.66	Pseudophakic	2017-02-20	30	2017-02-21	1	LA	5	2	10	no	on	no	Cryo of RB	SF6	no	yes	norm.	0	1	2018-04-26	14.3	no	1			F
50	69	OP	0.33	Phakic		5	2017-02-24		LA	7	4	12, 2	no	off	no	Cryo+Laser of RB	SF6	no	yes	hypertony	hypertony - spontaneous resolution	1	2017-12-04	9.43333	yes	1			M
51	42	OL	1	Phakic		7	2017-02-26		LA	3	3	10-12	no	on	no	Cryo in the extent of RD	SF6	no	yes	hypertony	Hypertony - topical medication	1.33	2017-11-03	8.33333	no	1			M
52	66	OL	0.01	Pseudophakic	2017-02-24	3	2017-03-02	6	LA	7	1	12	no	off	no	Cryo of RB	SF6	no	yes	norm.	0	0.5	2017-06-05	3.16667	no	1			M
53	49	OP	0.2	Pseudophakic	2017-03-21	1	2017-03-23	2	LA	6	1	11	no	off	no	Cryo of RB	SF6	no	yes	norm.	0	1	2017-06-19	2.93333	no	1			M
54	21	OL	0.1	Phakic			2017-04-06		LA	9	2	10, 11	no	on	no	Cryo of RB	SF6	no	yes	hypertony	Hypertony – topical medication+oral acetazolamide	1	2018-07-02	15.0667	no	1			M
55	74	OL	0.001	Pseudophakic	2017-04-18	7	2017-04-24	6	LA	6	3	5, 6	yes	off	no	Cryo of RB	C3F8	no	yes	norm.	ERM	0.8	2018-07-23	15.1667	no	1	rePPV for ERM 11/2017		M
56	54	OP	1	Phakic			2017-04-27		LA	6	3	1, 2-4	yes	on	no	Laser of RB	C3F8	no	yes	norm.	0	1	2018-03-13	10.6667	yes	1			M
57	52	OP	0.8	Pseudophakic	2017-04-26	4	2017-05-02	6	LA	12	5	2, 11, 6	yes	off	no	Cryo of RB+Laser 360°	C3F8	no	yes	hypertony	Hypertony - topical medication	0.33	2018-11-26	19.1	no	1			M
58	67	OL	0.66	Phakic			2017-05-16		LA	2	2	2	no	on	no	Cryo of RB	SF6	no	yes	norm.	0	0.5	2018-09-18	16.3333	yes	1			M
60	38	OL	0.66	Phakic	2017-05-18	4	2017-05-20	2	LA	6	5	7, 10-12	yes	on	no	Cryo+Laser of RB	C3F8	no	yes	norm.	0	1	2019-02-21	21.4	no	1			M
59	62	OL	1	Phakic			2017-05-20		LA	3	1	10	no	on	no	Cryo of RB	SF6	no	yes	norm.	0	1	2018-11-01	17.6667	yes	1			M
62	71	OL	0.033	Phakic		3	2017-06-03		LA	6	1	1	no	off	no	Cryo of RB	SF6	no	yes	norm.	0	0.6	2018-02-06	8.26667	yes	1			M
61	77	OP	0.1	Phakic	2017-06-02	5	2017-06-03	1	LA	6	1	12	no	off	no	Cryo of RB	SF6	no	no	norm.	0	0.9	2018-02-27	8.96667	yes	2	RePPV+C3F8 6/2017	PVR	M
63	76	OL	0.001	Phakic			2017-06-05		LA	6	1	1	no	off	no	Cryo of RB	SF6	no	yes	norm.	0	0.33	2019-03-29	22.0667	no	1			F
65	56	OP	0.001	Phakic	2017-06-05	1	2017-06-08	3	LA	7	4	12, 10	no	off	no	Cryo+Laser of RB	SF6	no	yes	norm.	0	0.666667	2019-02-14	20.5333	yes	1			M
64	44	OL	1	Phakic	2017-06-06	1	2017-06-08	2	LA	2	1	12	no	on	no	Cryo+Laser of RB	SF6	no	yes	norm.	0	1	2017-09-08	3.06667	no	1	st.p. pneumatic retinopexy		M
66	56	OP	0.1	Phakic		1	2017-06-24		LA	2	2	10-12, 10	no	on	no	Cryo of RB	SF6	no	yes	hypertony	Hypertony - topical medication	0.5	2018-01-18	6.93333	no	1			M
67	66	OL	0.5	Phakic			2017-06-24		LA	4	2	2, 6	yes	off	no	Cryo of RB	SF6	no	yes	norm.	0	0.666667	2017-12-08	5.56667	yes	1			M
68	45	OP	1	Phakic			2017-06-24		LA	6	10	5-7, 7-10, 4, 11	yes	off	no	Cryo of RB+Laser 360°	C3F8	yes	yes	hypertony	Hypertony - topical medication	1	2018-12-10	17.8	yes	1			M
69	86	OP	0.001	Pseudophakic	2017-07-01	3	2017-07-04	3	LA	5	1	10	no	off	no	Cryo of RB	SF6	no	no	hypertony	Hypertony - topical medication	0.5	2018-05-01	10.0333	no	2	PPV+C3F8 8/2017	RB in cryopexy scar	F
71	71	OP	0.01	Pseudophakic	2017-07-11	7	2017-07-13	2	LA	8	2	8,9	yes	off	no	Cryo of RB	C3F8	no	yes	norm.	0	1	2017-12-12	5.06667	no	1			M
70	79	OP	0.033	Pseudophakic		7	2017-07-13		LA	6	1	5-7	yes	off	no	Cryo of RB	C3F8	no	yes	hypertony	Hypertony - topical medication	0.16	2018-10-17	15.3667	no	1			F
72	67	OP	0.001	Phakic		5	2017-07-27		LA	9	4	7, 10, 11	yes	off	no	Cryo of RB	C3F8	no	yes	norm.	0	0.666667	2018-04-24	9.03333	yes	1			F
73	52	OP	0.16	Phakic		2	2017-07-28		LA	3	6	10-1, 4, 5, 6, 7, 8	yes	off	no	Cryo of RB+Laser 360°	C3F8	no	yes	norm.	0	1	2017-11-14	3.63333	yes	1			M
74	79	OP	0.001	Pseudophakic			2017-07-31		LA	9	1	10-11	no	off	no	Cryo of RB	SF6	no	yes	norm.	0	1	2019-03-01	19.2667	no	1			M
75	40	OP	0.25	Phakic		1	2017-07-31		LA	6	1	12	no	off	no	Cryo of RB	SF6	no	yes	norm.	0	1	2018-10-31	15.2333	no	1	scelar buckling for RD 2006		F
76	59	OL	0.001	Pseudophakic	2017-08-01	1	2017-08-01	0	LA	3	2	11, 1	no	on	no	Cryo of RB	SF6	no	yes	norm.	0	1	2019-04-01	20.2667	no	1			M
77	61	OP	0.66	Phakic		14	2017-08-01		LA	9	10	12-1, 2	no	on	no	Cryo of RB	C3F8	no	yes	norm.	0	1	2018-02-01	6.13333	yes	1			F
78	26	OP	0.33	Phakic		7	2017-08-03		CA	5	1	8	yes	on	no	Cryo of RB	C3F8	no	yes	norm.	0	0.3	2018-03-29	7.93333	no	1			M
79	42	OL	0.66	Phakic		5	2017-08-03		CA	5	1	11	no	on	no	Cryo+Laser of RB	SF6	no	yes	norm.	0	1	2017-12-01	4	no	1			F
80	53	OL	0.66	Phakic			2017-08-04		LA	4	1	1	no	off	no	Cryo of RB	SF6	no	yes	norm.	0	1	2019-01-22	17.8667	no	1			F
81	66	OL	0.5	Pseudophakic			2017-08-06		LA	5	6	1, 12, 11, 10, 6	yes	off	no	Cryo of RB	SF6	no	yes	norm.	ERM	1	2018-04-06	8.1	no	1			F
82	50	OL	0.001	Phakic	2017-08-20	1	2017-08-21	1	LA	7	1	1	no	off	no	Cryo of RB	SF6	no	no	norm.	0	0.333333	2018-12-10	15.8667	no	2	RePPV+SF6 2/11/2018	RB in cryopexy scar	F
83	44	OL	1	Pseudophakic		20	2017-09-11		CA	5	2	11-12, retinotomy	no	on	no	Cryo of RB	C3F8	no	yes	hypertony	Hypertony - topical medication	1	2019-04-05	19.0333	no	1			M
84	25	OL	0.0333333	Pseudophakic		2	2017-09-18		CA	10	1	12-2	no	off	no	Cryo of RB	SF6	no	no	norm.	0	0.1	2018-02-27	5.4	no	2	rePPV+C3F8 12/2017	RB in cryopexy scar	M
85	44	OP	0.666667	Phakic		12	2017-10-09		CA	3	1	10	no	on	no	Cryo in the extent of RD	SF6	no	yes	norm.	0	0.5	2018-10-16	12.4	no	1			F
86	72	OL	0.666667	Pseudophakic			2017-10-10		LA	7	1	11	no	on	no	Cryo of RB	SF6	no	yes	norm.	0	1	2018-03-22	5.43333	no	1			F
87	64	OP	0.5	Pseudophakic	2017-10-20	10	2017-10-23	3	LA	6	3	2,7,10	yes	off	no	Cryo of RB	C3F8	no	yes	hypertony	Hypertony - topical medication	1	2019-03-19	17.0667	no	1			M
88	59	OL	0.05	Phakic		6	2017-10-26		LA	7	2	12,5	yes	off	no	Cryo of RB	C3F8	no	yes	norm.	0	0.25	2018-08-02	9.33333	no	1			M
89	68	OL	0.05	Phakic		7	2017-11-02		LA	6	2	1,2	no	off	no	Cryo of RB	SF6	no	yes	norm.	0	0.3	2018-05-29	6.93333	no	1			F
90	69	OP	0.001	Pseudophakic	2017-11-18	1	2017-12-04	16	LA	9	3	6, 10, 12	yes	off	no	Cryo in the extent of RD	SF6	no	no	norm.	0	0.25	2018-09-17	9.56667	no	2	rePPV+C3F8 1/2018	RB in cryopexy scar	F
91	64	OL	0.1	Phakic	2017-12-19	3	2017-12-20	1	LA	7	10	1-12	yes	off	no	Cryo 360°	C3F8	no	yes	hypertony	0	0.666667	2018-10-08	9.73333	yes	1			M
92	66	OL	0.666667	Pseudophakic		3	2018-01-18		LA	5	1	10	no	on	no	Cryo of RB	SF6	no	yes	norm.		0.8	2018-04-09	2.7	no	1			M
93	52	OP	0.1	Phakic		14	2018-01-23		LA	7	10	4-8	yes	off	no	Cryo 360°	C3F8	no	yes	norm.	0	1.33333	2018-11-12	9.76667	yes	1			F
94	59	OL	0.666667	Pseudophakic			2018-01-29		LA	5	2	6,7	yes	on	no	Cryo of RB	C3F8	no	yes	norm.	0	1	2019-03-28	14.1	no	1			M
95	34	OP	0.666667	Phakic		7	2018-02-09		LA	5	4	6, 7, 10, 11	yes	on	no	Cryo in the extent of RD	C3F8	no	yes	norm.	0	1	2018-07-27	5.6	no	1			F
96	77	OL	0.05	Phakic		21	2018-02-13		LA	6	1	1	no	off	no	Cryo of RB	SF6	no	yes	norm.	0	0.4	2018-10-10	7.96667	yes	1			F
97	46	OL	0.666667	Phakic	2018-03-06	42	2018-03-07	1	LA	5	1	11	no	on	no	Cryo of RB	SF6	no	yes	norm.	0	0.4	2018-05-22	2.53333	no	1			F
99	73	OL	0.666667	Phakic			2018-03-09		LA	3	1	10	no	on	no	Cryo of RB	SF6	no	yes	norm.	0	0.5	2018-06-11	3.13333	yes	1			M
98	57	OP	1	Phakic	2018-03-07	8	2018-03-09	2	LA	8	1	1	no	on	no	Cryo in the extent of RD	SF6	no	yes	norm.	0	0.8	2018-10-29	7.8	yes	1			M
100	52	OL	1	Phakic	2018-03-09	1	2018-03-09	0	LA	7	3	10,11,12	no	on	no	Cryo of RB	SF6	no	yes	hypertony	Hypertony - topical medication	0.8	2018-09-10	6.16667	no	1			F
101	57	OL	0.001	Pseudophakic	2018-03-14	1	2018-03-15	1	LA	12	1	11	no	off	no	Cryo of RB	SF6	no	yes	hypertony	Hypertony - topical medication	0.1	2018-07-16	4.1	no	1			M
102	72	OP	0.333333	Pseudophakic	2018-04-13	5	2018-04-14	1	LA	6	2	2,6	yes	off	no	Cryo in the extent of RD	C3F8	no	yes	hypertony	Hypertony - topical medication	0.8	2018-10-08	5.9	no	1			F
103	69	OP	0.0333333	Phakic		30	2018-05-10		LA	3	1	11	no	off	no	Cryo of RB	SF6	no	yes	norm.	0	0.25	2019-01-15	8.33333	no	1			F
104	53	OL	0.001	Phakic	2018-05-13	1	2018-05-15	2	LA	6	3	2,4,5	yes	on	no	Cryo in the extent of RD	C3F8	no	yes	hypertony	Hypertony - topical medication	0.666667	2019-04-12	11.0667	no	1			M
105	78	OP	0.001	Pseudophakic	2018-06-07	0	2018-06-07	0	LA	4	1	11	no	off	no	Cryo of RB	SF6	no	yes	norm.	0	0.8	2018-10-08	4.1	no	1			F
106	52	OP	0.666667	Phakic	2018-06-25	10	2018-06-26	1	LA	2	1	7-8	yes	on	no	Cryo of RB	C3F8	no	yes	norm.	0	0.666667	2018-10-02	3.26667	no	1			F
				34

## Sheet: ISG
Patient number	Age	Eye	BCVA	Lens status	Date of diagnosis	Duration of symptoms (days)	Date of surgery	Time to surgery (days)	Anesthesia	RD extent (hours)	Number of RB	RB localization	RB between 4-8	Macula on/off	Perfluorodecalin?	Laser? Cryo?	Tamponade	Sutures ?	Reattachement?	Postoper. IOP	Postoper. Complications	Last BCVA	Last check-up	Months of follow-up	Cataract surgery?	Number of surgeries	Note	Reason for redatchement	Sex
1	71	OL	0.66	Phakic	2015-10-01	5	2015-10-02	1	LA	3	1	11	no	on	no	Cryo of RB	SF6	no	ano	norm.	0	1	2016-10-12	12.5333	yes	1			F
2	62	OP	0.66	Phakic	2015-10-05	14	2015-10-06	1	LA	4	2	12, 2	no	on	no	Cryo of RB	SF6	no	ne	norm.	0	0.25	2017-11-10	25.5333	yes	3	reoper. 2x, 1. rePPV+SO 16.11.2015, 2. rePPV+retinectomy+SO 17.12.2015, SOex 15.3.2016	new RB	M
3	61	OP	0.001	Pseudophakic		10	2015-10-27		LA	7	2	11, 2	no	off	no	Cryo of RB	C3F8	no	ano	norm.	0	0.8	2016-05-06	6.4	no	1			F
4	69	OP	0.1	Phakic	2015-10-16		2015-10-29	13	LA	5	1	11	no	off	yes	Cryo of RB	C3F8	no	ano	norm.	0	1	2016-08-01	9.23333	yes	1			F
5	66	OL	0.4	Pseudophakic	2015-10-29	10	2015-10-30	1	LA	4	1	7	yes	on	no	Cryo of RB	C3F8	no	ano	norm.	0	0.666667	2018-09-07	34.7667	no	1			M
6	63	OP	0.033	Phakic	2015-11-11	14	2015-11-12	1	LA	4	1	9-10	no	off	no	Cryo of RB	C3F8	yes	ano	norm.	0	1	2019-03-01	40.1667	yes	1			F
7	49	OP	0.5	Phakic		12	2015-11-13		LA	4	4	1	no	on	no	Cryo of RB	C3F8	no	ano	hypertony	hypertony - topical medication	1	2016-06-27	7.56667	yes	1			F
8	68	OL	0.1	Pseudophakic	2016-01-05	5	2016-01-07	2	LA	7	1	10,5	yes	off	yes	Cryo of RB	C3F8	no	ano	norm.	hypertony - topical medication	1	2017-09-12	20.4667	no	1			F
9	74	OP	0.01	Phakic	2016-01-11	5	2016-01-14	3	LA	10	2	10	no	off	yes	Cryo 360°	C3F8	no	ano	hypertony	hypertony - topical medication, ERM	0.8	2018-12-03	35.1333	yes	1	rePPV for ERM 4/2017		M
10	62	OL	0.001	Phakic	2016-01-26	1	2016-01-28	2	LA	5	10	1,5, 12, retinotomy	yes	off	yes	Cryo+Laser of RB	SF6	no	ano	norm.	0	0.33	2017-05-17	15.8333	yes	1			M
11	66	OL	0.001	Pseudophakic		4	2016-02-04		LA	5	1	1	no	off	yes	Cryo of RB	C3F8	yes	ano	hypertony	hypertony - topical medication	0.8	2016-04-25	2.7	no	1			M
12	56	OP	1	Pseudophakic	2016-02-25	1	2016-02-26	1	LA	6	4	8-12, 1-3, 7	yes	on	no	Cryo of RB	C3F8	yes	ano	hypertony	hypertony - topical medication	1	2016-10-10	7.56667	no	1			M
13	63	OL	1	Phakic		28	2016-03-03		LA	3	4	11, 1, 2, 6	yes	on	no	Cryo of RB	C3F8	no	ano	norm.	0	1	2017-01-03	10.2	yes	1			F
14	57	OL	0.66	Pseudophakic	2016-03-22	14	2016-03-24	2	LA	5	2	10-2, 2	no	on	yes	Cryo of RB+Laser 360°	C3F8	no	ano	hypertony	hypertony - topical medication+oral acetazolamide	0.666667	2017-11-14	20	no	1	high myopia		F
15	59	OP	0.001	Phakic	2016-04-16	14	2016-04-18	2	LA	10	4	8	yes	off	no	Cryo of RB	C3F8	no	ano	norm.	0	0.666667	2018-10-31	30.8667	yes	1			F
16	64	OP	0.001	Pseudophakic	2016-05-18	3	2016-05-19	1	LA	12	3	1, 6	yes	off	yes	Cryo 360°	C3F8	no	ano	hypertony	hypertony - topical medication	1	2017-09-26	16.5	no	1			F
17	64	OL	0.001	Phakic	2016-05-25	7	2016-05-26	1	LA	6	4	10, 12, 1, 5	yes	off	no	Cryo of RB	C3F8	no	ne	hypertony	hypertony - topical medication	0.25	2018-10-01	28.6	yes	3	reoper. 2X, 1. rePPV+C3F8 9/2016, 2. rePPV+SO+PVR dissection 12/2016	open original RB	F
18	82	OL	0.16	Phakic	2016-05-31	5	2016-06-02	2	LA	6	3	2, 2, retinotomy	no	off	yes	Cryo in the extent of RD	C3F8	yes	ano	norm.	0	1	2017-02-20	8.76667	yes	1			M
19	55	OP	0.001	Phakic			2016-06-05		LA	11	7	11, 5-7	yes	off	yes	Cryo in the extent of RD	C3F8	no	ano	norm.	0	0.63	2017-09-01	15.1	yes	1			F
20	72	OP	0.66	Pseudophakic	2016-06-01	1	2016-06-10	9	LA	4	4	9, 11, 7	yes	on	no	Cryo of RB	C3F8	no	ano	norm.	0	0.8	2016-09-30	3.73333	no	1			M
21	64	OP	0.001	Phakic		7	2016-06-30		LA	5	4	10-12, 7	yes	off	no	Cryo of RB	C3F8	no	ne	norm.	0	0.25	2016-11-22	4.83333	yes	2	rePPV+C3F8 8/2016	RB in cryopexy scar	F
22	75	OP	0.001	Pseudophakic	2016-06-29	4	2016-06-30	1	LA	6	1	10-11	no	off	no	Cryo in the extent of RD	C3F8	no	ano	norm.	0	0.5	2016-10-03	3.16667	no	1			F
23	62	OP	0.001	Pseudophakic	2016-07-02	0	2016-07-04	2	LA	6	2	11, 1	no	off	no	Cryo of RB	C3F8	no	ano	norm.	0	0.666667	2017-03-09	8.26667	no	1			M
24	67	OP	0.33	Phakic		14	2016-07-06		LA	4	1	10	no	on	no	Cryo of RB	SF6	no	ano	norm.	0	1	2017-01-16	6.46667	yes	1			M
25	83	OP	0.01	Pseudophakic	2016-07-20	7	2016-07-22	2	LA	6	1	11	no	off	no	Cryo of RB	C3F8	no	ano	hypertony	hypertony - topical medication, ERM	0.66	2017-05-15	9.9	no	1	rePPV for ERM 9/2016		F
27	70	OL	0.1	Phakic	2016-07-18	5	2016-07-22	4	LA	11	1	11	no	off	no	Cryo of RB	C3F8	no	ano	norm.	0	0.25	2016-10-13	2.76667	yes	1			M
26	75	OP	0.33	Pseudophakic			2016-07-22		LA	4	2	10, 11	no	off	no	Cryo of RB	C3F8	no	ano	norm.	0	0.8	2017-10-02	14.5667	no	1			F
28	76	OL	0.01	Pseudophakic		6	2016-07-25		LA	12	1	1	no	off	no	Cryo 360°	C3F8	no	ano	norm.	0	0.4	2017-04-03	8.4	no	1			M
29	68	OP	0.33	Pseudophakic		10	2016-07-27		LA	5	1	11	no	off	no	Cryo of RB	C3F8	no	ano	norm.	0	0.8	2019-02-11	30.9667	no	1			M
30	57	OP	1	Phakic		10	2016-08-16		LA	5	10	1, 4, 6, 8, 9, 11	yes	on	no	Cryo of RB+Laser 360°	C3F8	no	ano	norm.	0	1	2018-04-11	20.1	yes	1	high myopia		F
31	59	OL	0.66	Phakic	2016-08-17	2	2016-08-18	1	LA	1	2	1, 5	yes	on	no	Cryo of RB	SF6	no	ano	norm.	0	0.8	2017-07-26	11.4	no	1			F
32	61	OP	1	Pseudophakic			2016-09-01		LA	4	1	2	no	on	no	Cryo in the extent of RD	C3F8	no	ano	hypertony	hypertony - topical medication	1	2018-08-21	23.9667	no	1			F
33	62	OL	0.16	Pseudophakic			2016-09-22		LA	8	1	6	yes	off	no	Cryo of RB+Laser 360°	C3F8	no	ano	hypertony	hypertony - topical medication	0.33	2017-07-14	9.83333	no	1			M
34	72	OL	0.3	Phakic	2016-09-26		2016-09-27	1	LA	6	3	1	no	off	no	Laser in the extent of RD	C3F8	no	ano	hypotony	hypotony - spontaneous resolution	0.8	2017-02-17	4.76667	yes	1			F
35	64	OP	0.25	Phakic		14	2016-10-04		LA	6	1	10	no	off	no	Cryo of RB	SF6	no	ano	norm.	0	0.66	2017-03-17	5.46667	yes	1			F
36	73	OL	0.05	Phakic	2016-11-02	7	2016-11-08	6	LA	8	3	2, 2-3	no	off	yes	Cryo+Laser in the extent of RD	C3F8	no	ano	norm.	0	0.5	2017-06-28	7.73333	yes	1			M
37	60	OL	1	Phakic			2016-12-30		LA	3	2	2, 5	yes	on	no	Cryo+Laser of RB	C3F8	no	ano	hypertony	hypertony - topical medication	1	2019-04-03	27.4667	yes	1			M
38	66	OP	0.016	Phakic			2017-01-20		LA	8	1	12	no	on	no	Cryo of RB	SF6	no	ano	norm.	0	1	2018-10-08	20.8667	no	1			F
39	70	OP	0.05	Pseudophakic			2017-01-24		LA	5	2	11	no	off	no	Cryo of RB	C3F8	no	ano	norm.	0	0.8	2017-05-16	3.73333	no	1			M
41	78	OP	0.05	Pseudophakic	2017-01-24	3	2017-01-26	2	LA	6	1	11	no	off	no	Cryo of RB	C3F8	no	ne	norm.	0	0.5	2017-10-02	8.3	no	2	rePPV+PVR dissection+C3F8 4/2017	new RB	F
40	71	OP	0.15	Phakic			2017-01-26		LA	6	1	11	no	off	no	Cryo of RB	SF6	no	ano	norm.	0	0.8	2017-07-12	5.56667	no	1			M
42	60	OP	0.33	Phakic			2017-02-03		LA	7	2	2, 12	no	on	no	Cryo in the extent of RD	C3F8	no	ano	hypertony	hypertony - topical medication	1	2017-09-22	7.7	yes	1			M
43	86	OP	0.001	Phakic	2017-02-13	2	2017-02-14	1	LA	5	1	11	no	off	no	Cryo of RB	C3F8	no	ano	hypertony	hypertony - topical medication, iatrogenic posterior lens capsule tear	0.333333	2018-03-06	12.8333	yes	1			F
44	52	OP	0.05	Phakic	2017-03-13	2	2017-03-14	1	LA	3	2	11, 12	no	off	no	Cryo in the extent of RD	SF6	no	ano	hypertony	hypertony - topical medication, ERM	0.33	2018-11-19	20.5	yes	1	rePPV+peel for ERM 10/2018		F
45	59	OP	0.16	Pseudophakic	2017-03-24	3	2017-03-26	2	LA	7	2	7, 9	yes	off	no	Cryo in the extent of RD	C3F8	no	ano	hypertony	hypertony - topical medication	1	2017-09-01	5.3	no	1			M
46	56	OL	0.5	Phakic		3	2017-03-30		LA	4	10	2, temp., 5	yes	off	no	Cryo+Laser in the extent of RD	C3F8	no	ano	norm.	0	1	2018-07-04	15.3667	yes	1			M
47	59	OL	0.33	Pseudophakic		14	2017-04-07		LA	6	2	10, retinotomy 9	no	off	no	Cryo of RB+Laser 360°	C3F8	no	ano	hypertony	hypertony - topical medication	1	2017-08-14	4.3	no	1			F
48	70	OP	0.033	Pseudophakic	2017-04-14	2	2017-04-15	1	LA	4	1	10	no	off	no	Cryo of RB	SF6	no	ano	norm.	0	0.8	2018-01-08	8.93333	no	1			F
49	77	OL	0.02	Pseudophakic			2017-04-18		LA	4	1	3	no	off	no	Cryo in the extent of RD	C3F8	no	ano	norm.	ERM	0.4	2018-05-25	13.4	no	1	rePPV+peel for ERM 29.9.2017		M
50	75	OP	0.05	Phakic			2017-04-20		LA	5	1	2	no	off	no	Cryo of RB	C3F8	no	ano	hypertony	hypertony - topical medication	0.66	2018-04-10	11.8333	yes	1			M
52	60	OP	0.33	Phakic			2017-04-28		LA	4	1	10-11	no	off	no	Cryo of RB	SF6	no	ano	norm.	0	1	2018-11-01	18.4	yes	1			F
51	65	OP	0.66	Phakic			2017-04-28		LA	5	2	2	no	on	no	Cryo of RB	SF6	no	ano	norm.	intraocular hemorrhage	1	2018-03-12	10.6	yes	1	rePPV for intraocular hemorrhage 30/5/2017		M
53	59	OL	0.001	Pseudophakic	2017-05-11	2	2017-05-11	0	LA	6	2	1-2, 4	yes	off	no	Cryo+Laser of RB	C3F8	no	ano	hypertony	hypertony - topical medication	1	2019-01-09	20.2667	no	1			M
54	66	OP	0.13	Phakic		4	2017-05-16		LA	5	4	7, 9	yes	off	no	Cryo in the extent of RD	SF6	no	ano	norm.	0	1	2019-02-27	21.7333	yes	1			F
55	70	OL	0.001	Pseudophakic	2017-05-17	1	2017-05-18	1	LA	5	2	2, 6	yes	off	no	Cryo+Laser of RB	C3F8	no	ano	norm.	0	0.8	2017-10-02	4.56667	no	1			M
56	50	OL	0.16	Pseudophakic	2017-05-31	14	2017-06-02	2	LA	12	1	6	yes	off	no	Cryo+Laser of RB	C3F8	no	ano	norm.	0	1	2018-11-01	17.2333	no	1			M
57	53	OL	0.5	Phakic	2017-06-07		2017-06-08	1	LA	3	2	10	no	on	no	Cryo+Laser of RB	SF6	no	ano	norm.	0	0.66	2017-10-04	3.93333	yes	1			F
58	70	OL	1	Phakic		3	2017-06-13		LA	9	2	11, retinotomy 3	no	off	no	Cryo+Laser of RB	C3F8	no	ano	norm.	0	1	2017-10-23	4.4	yes	1			M
59	66	OP	0.001	Pseudophakic	2017-06-16	2	2017-06-22	6	LA	9	1	10	no	off	no	Cryo of RB	C3F8	no	ano	norm.	0	0.8	2017-11-03	4.46667	no	1			M
61	83	OL	0.001	Pseudophakic			2017-06-22		LA	7	4	1, 2, 3	no	off	no	Cryo in the extent of RD	C3F8	no	ne	hypertony	hypertony - spontaneous resolution	0.5	2018-09-20	15.1667	no	2	rePPV+C3F8 7/2017	new RB	F
60	63	OL	1	Phakic			2017-06-22		LA	2	7	1-2, 6, 8, 9, 11, 3	yes	on	no	Cryo of RB+Laser 360°	SF6	no	ano	norm.	0	1	2018-01-08	6.66667	yes	1			M
62	67	OL	0.5	Phakic			2017-06-29		LA	2	4	10-12, 5-6	yes	on	no	Cryo of RB	SF6	no	ano	norm.	0	0.66	2019-04-09	21.6333	yes	1			M
63	66	OL	0.33	Phakic		4	2017-07-14		LA	3	2	1	no	off	no	Cryo+Laser of RB	SF6	no	ano	norm.	0	1	2018-11-12	16.2	yes	1			M
64	51	OP	0.01	Phakic		7	2017-07-18		LA	10	1	2	no	off	no	Cryo in the extent of RD	SF6	no	ano	norm.	0	0.5	2018-01-17	6.1	no	1			F
65	58	OP	0.66	Phakic		2	2017-07-25		LA	8	2	10, 3	no	on	no	Cryo in the extent of RD	SF6	no	ano	hypertony	hypertony - topical medication+oral acetazolamide	1	2018-11-01	15.4667	yes	1			M
66	71	OP	0.001	Pseudophakic			2017-08-04		LA	6	4	11, 7	yes	off	no	Cryo of RB+Laser 360°	C3F8	no	ano	norm.	0	0.8	2017-12-18	4.53333	no	1			M
67	70	OL	0.5	Pseudophakic		14	2017-08-28		LA	7	1	10	no	on	no	Cryo in the extent of RD	SF6	no	ano	norm.	0	0.1	2019-01-14	16.8	no	1			F
68	74	OP	0.05	Phakic			2017-08-31		LA	7	2	11, 1	no	off	no	Cryo+Laser of RB	SF6	no	ano	norm.	0	0.7	2018-03-27	6.93333	yes	1			M
69	53	OP	0.66	Phakic	2017-09-04		2017-09-05	1	LA	2	1	10	no	on	no	Cryo in the extent of RD	SF6	no	ano	hypertony	hypertony - topical medication	1	2019-01-01	16.1	yes	1			M
71	59	OP	0.01	Phakic		2	2017-09-17		LA	5	1	11	no	off	no	Cryo in the extent of RD	SF6	no	ano	hypertony	0	0.25	2018-11-29	14.6	yes	1			M
70	59	OL	0.66	Pseudophakic	2017-09-15	14	2017-09-17	2	LA	3	1	9	no	on	no	Cryo in the extent of RD	SF6	no	ano	hypertony	hypertony - topical medication+oral acetazolamide	0.8	2019-03-04	17.7667	no	1			F
72	77	OL	0.05	Pseudophakic	2017-10-06	4	2017-10-09	3	LA	4	1	2	no	off	no	Cryo of RB	SF6	no	ano	norm.	0	0.8	2018-03-16	5.26667	no	1			F
73	57	OP	0.0166667	Pseudophakic			2017-10-24		LA	4	2	10, retinotomy	no	off	no	Cryo+Laser of RB	SF6	no	ano	norm.	0	1	2018-01-29	3.23333	no	1			M
74	51	OP	0.666667	Phakic		1	2017-10-27		LA	6	2	3.11	no	on	no	Cryo of RB	SF6	no	ano	norm.	0	0.8	2018-02-26	4.06667	no	1			F
76	66	OL	0.0333333	Phakic		4	2017-10-28		LA	4	1	2	no	off	no	Cryo of RB	SF6	no	ano	hypertony	hypertony - topical medication	1	2018-06-19	7.8	yes	1			F
75	69	OP	0.333333	Phakic		14	2017-10-28		LA	5	1	10	no	on	no	Cryo of RB	SF6	no	ano	norm.	0	1	2018-03-09	4.4	yes	1			F
77	33	OP	1	Phakic		1	2017-10-28		CA	3	1	10	no	on	no	Cryo of RB+Laser 360°	C3F8	yes	ano	norm.	0	1	2018-10-15	11.7333	no	1			F
78	59	OL	1	Phakic	2017-10-27	7	2017-10-28	1	LA	4	1	10	no	on	no	Cryo in the extent of RD	SF6	no	ano	hypertony		1	2018-08-20	9.86667	yes	1			M
79	65	OL	1	Pseudophakic		50	2017-11-25		LA	7	2	10	no	on	no	Cryo in the extent of RD	C3F8	no	ano	hypertony	hypertony - topical medication	1	2018-03-26	4.03333	no	1			F
80	72	OL	0.01	Phakic		7	2017-11-28		LA	12	1	1	no	off	no	Cryo 360°	C3F8	no	ano	hypertony	hypertony - spontaneous resolution	0.666667	2019-03-14	15.7	yes	1			F
82	71	OP	0.001	Pseudophakic			2017-11-30		LA	11	6	1, 2, 5, 6, 8, 11	yes	off	no	Cryo of RB+Laser 360°	C3F8	no	ano	hypertony	hypertony - topical medication	1	2019-03-26	16.0333	no	1			M
81	72	OP	0.02	Phakic		5	2017-11-30		LA	7	1	10-11	no	off	no	Cryo of RB	C3F8	no	ano	norm.	macular hole	0.2	2019-01-14	13.6667	no	1	rePPV for macular hole		M
83	73	OP	0.0333333	Phakic		3	2017-12-12		LA	11	1	10	no	off	no	Cryo of RB	SF6	no	ne	norm.	0	0.666667	2018-05-21	5.33333	yes	2	rePPV+SF6 18/1/2018	RB in cryopexy scar	M
84	86	OL	0.001	Pseudophakic		7	2017-12-18		LA	9	10	5, 6, 7, 8, 11	yes	off	no	Laser 360°	C3F8	no	ano	hypertony	hypertony - topical medication	0.02	2018-04-27	4.33333	no	1			F
85	40	OL	0.0666667	Phakic		1	2017-12-22		LA	5	1	1	no	off	no	Cryo of RB	SF6	no	ano	norm.	0	0.8	2018-05-25	5.13333	no	1	laser barricade around the RB prior to the PPV		F
86	49	OL	0.333333	Phakic		4	2017-12-27		LA	4	1	9	no	on	no	Cryo of RB	SF6	no	ano	norm.	0	0.8	2018-03-15	2.6	no	1			M
87	62	OL	0.5	Pseudophakic	2017-12-27	1	2017-12-27	0	LA	8	10	11, 12, 1-3	no	on	no	Cryo in the extent of RD	SF6	no	ano	norm.	0	1	2018-03-13	2.53333	no	1			M
88	54	OP	0.0666667	Pseudophakic		6	2017-12-29		LA	8	5	4-6, 7, 8, 9	yes	off	no	Cryo+Laser in the extent of RD	C3F8	no	ano	hypertony	hypertony - topical medication	0.5	2018-03-29	3	no	1			M
89	55	OP	0.666667	Pseudophakic			2018-01-12		LA	4	2	2, retinotomy	no	on	no	Cryo+Laser of RB	SF6	no	ano	norm.	0	1	2018-08-03	6.76667	no	1			F
90	68	OL	0.01	Phakic		2	2018-01-23		LA	6	1	2	no	off	no	Cryo of RB	SF6	no	ano	hypertony	hypertony - topical medication	0.5	2018-07-13	5.7	yes	1			M
91	57	OP	0.1	Phakic	2018-01-11	4	2018-01-25	14	LA	11	1	11	no	off	no	Cryo of RB	SF6	no	ano	hypertony	hypertony - topical medication, ERM	0.333333	2018-06-01	4.23333	yes	1			F
92	75	OP	0.25	Pseudophakic		25	2018-02-06		LA	5	1	5	yes	on	no	Laser 360°	C3F8	no	ne	norm.	0	0.125	2018-12-03	10	no	3	reoper. 2x, 1. rePPV+PVR dissection+retinectomy+SO SO 3/5/2018, 2.rePPV+PVRdissection+retinectomy 1/10/2018, postoperative hypotony	PVR	M
93	58	OL	1	Phakic	2018-02-08	5	2018-02-09	1	LA	3	2	4, 5	yes	on	no	Cryo of RB	C3F8	no	ano	norm.	0	1	2018-12-28	10.7333	yes	1			F
94	53	OP	0.25	Phakic			2018-02-15		LA	11	3	1-2, 4, 6	yes	off	no	Cryo of RB	C3F8	no	ano	norm.	0	0.5	2018-08-28	6.46667	yes	1			M
96	60	OL	0.01	Phakic			2018-03-09		LA	3	6	4-7, 1	yes	on	no	Laser 360°	C3F8	no	ano	norm.	0	0.4	2018-08-23	5.56667	no	1			F
95	62	OL	0.666667	Pseudophakic	2018-03-09	1	2018-03-09	0	LA	7	2	7, 11	yes	on	no	Cryo in the extent of RD	C3F8	no	ano	hypertony	hypertony - topical medication	0.8	2018-07-13	4.2	no	1			F
97	45	OP	1	Phakic	2018-03-09	5	2018-03-11	2	LA	2	5	8-10	yes	on	no	Laser of RB	SF6	yes	ano	hypertony	hypertony - topical medication	1	2018-11-23	8.56667	yes	1	laser barricade around the RB prior to the PPV		F
98	43	OP	0.666667	Phakic	2018-03-29	4	2018-03-30	1	LA	3	4	2,4,7,10	yes	on	no	Cryo of RB	C3F8	no	ano	hypertony	0	1	2019-01-10	9.53333	yes	1			M
99	50	OL	0.666667	Phakic	2018-04-01		2018-04-02	1	LA	3	2	1	no	on	no	Cryo of RB	SF6	no	ano	norm.	hypertony - topical medication	0.8	2019-02-11	10.5	no	1			M
100	49	OP	0.02	Phakic	2018-04-03	14	2018-04-05	2	LA	6	1	11	no	off	no	Cryo of RB	SF6	no	ano	norm.	0	0.333333	2018-12-18	8.56667	no	1			F
101	65	OP	0.001	Phakic	2018-04-11	4	2018-04-17	6	LA	12	2	10, 12	no	off	no	Cryo of RB	SF6	no	ano	norm.	0	0.25	2018-10-01	5.56667	no	1			M
102	69	OP	0.8	Phakic			2018-04-24		LA	2	6	10-12, 1,5,8	yes	on	no	Cryo of RB+Laser 360°	C3F8	no	ano	norm.	0	0.666667	2018-10-10	5.63333	no	1			M
103	67	OP	0.666667	Phakic			2018-04-27		LA	2	4	10, 12, 1, 6	yes	on	no	Cryo 360°	C3F8	no	ano	norm.	0	0.666667	2018-11-12	6.63333	yes	1			F
104	61	OL	0.666667	Phakic	2018-05-04	3	2018-05-04	0	LA	3	4	3,5,2,11	yes	on	no	Cryo of RB+Laser 360°	C3F8	no	ano	hypertony	0	1	2018-10-29	5.93333	yes	1			M
105	74	OP	0.001	Phakic		10	2018-05-07		LA	12	2	5,8	yes	off	no	Cryo of RB	C3F8	no	ano	norm.	0	0.5	2018-10-24	5.66667	yes	1			M
106	61	OP	1	Phakic		25	2018-05-11		LA	4	2	7, 10	yes	on	no	Cryo 360°	C3F8	yes	ano	norm.	0	0.8	2018-12-10	7.1	yes	1			M
107	48	OP	0.666667	Phakic	2018-05-16	6	2018-05-17	1	LA	3	3	1,2,6	yes	on	no	Cryo of RB	SF6	no	ano	norm.	0	0.8	2019-02-27	9.53333	yes	1			F
108	56	OL	0.666667	Phakic		1	2018-06-01		LA	3	5	1,2,3	no	on	no	Cryo of RB+Laser 360°	SF6	no	ano	hypertony	0	0.8	2018-12-18	6.66667	yes	1			M
109	49	OL	0.166667	Phakic	2018-06-20	2	2018-06-21	1	LA	4	1	5	yes	off	no	Cryo+Laser in the extent of RD	C3F8	yes	ano	norm.	0	0.166667	2018-11-13	4.83333	yes	1			F
110	67	OL	1	Phakic			2018-06-21		LA	3	1	4	yes	on	no	Cryo+Laser of RB	C3F8	no	ano	hypertony	0	1	2018-12-07	5.63333	yes	1			M
